# Supplementary material for: Baseline fibroblast growth factor 23 is associated with long-term mortality in ST-elevation myocardial infarction—results from the augsburg myocardial infarction registry
Source: PubMed Central journal article supplement (PMC10436601; doi:10.3389/fcvm.2023.1173281), 2023-08-04
Supplement: Datasheet1.pdf [file Datasheet1.pdf]

## Baseline Fibroblast Growth Factor 23 is associated with long-term mortality in ST-elevation myocardial infarction – results from the Augsburg Myocardial Infarction Registry.

Schmitz T, Wein B, Heier M, Peters A, Meisinger C, Linseisen J

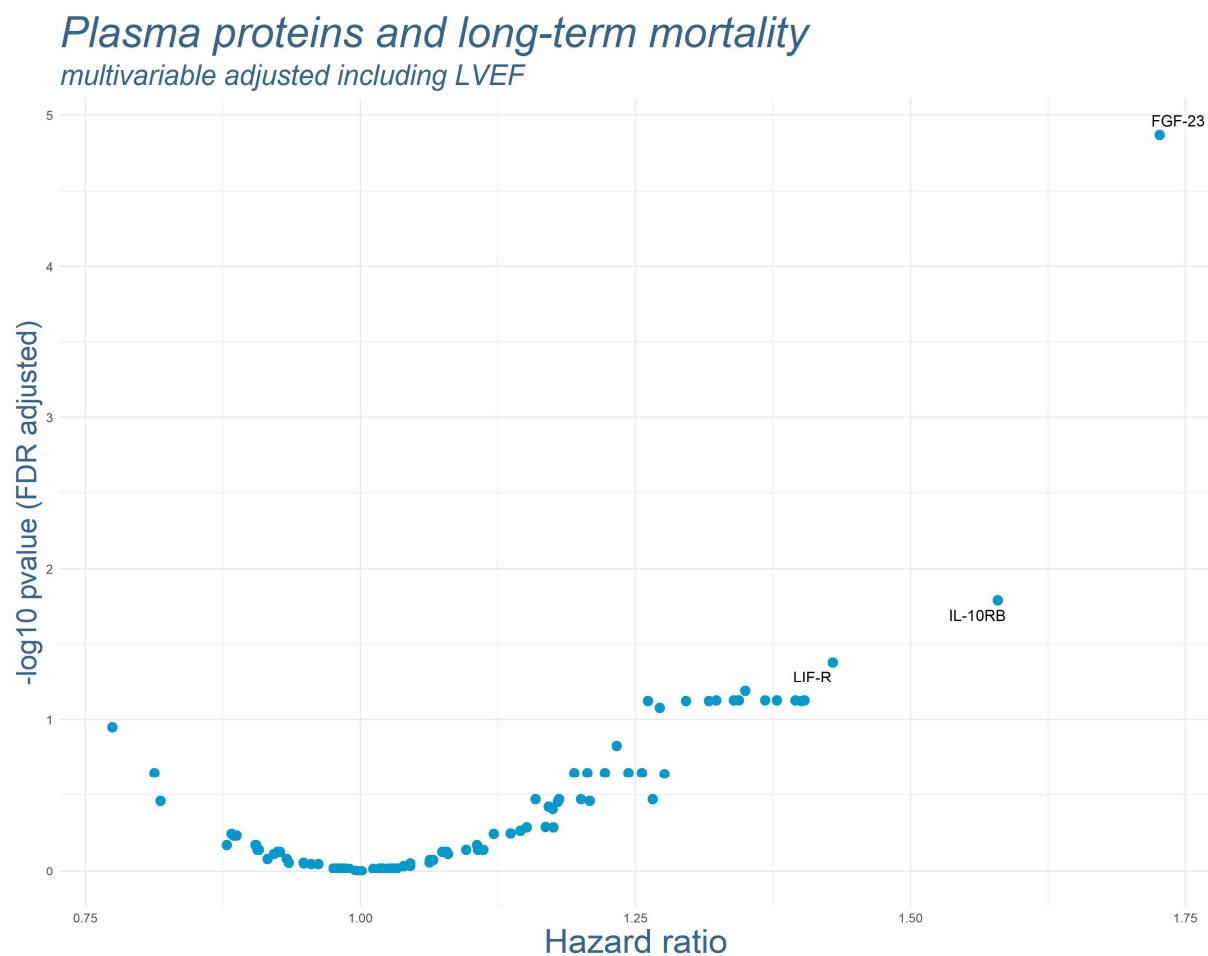

**Figure S1:** Results of the multivariable adjusted Cox regression models including prehospital time. P-values were FDR-adjusted. Names of the markers are presented for all markers with FDR-adjusted p-values below 0.05.

*Plasma proteins and long-term mortality*  
*multivariable adjusted including prehospital time*

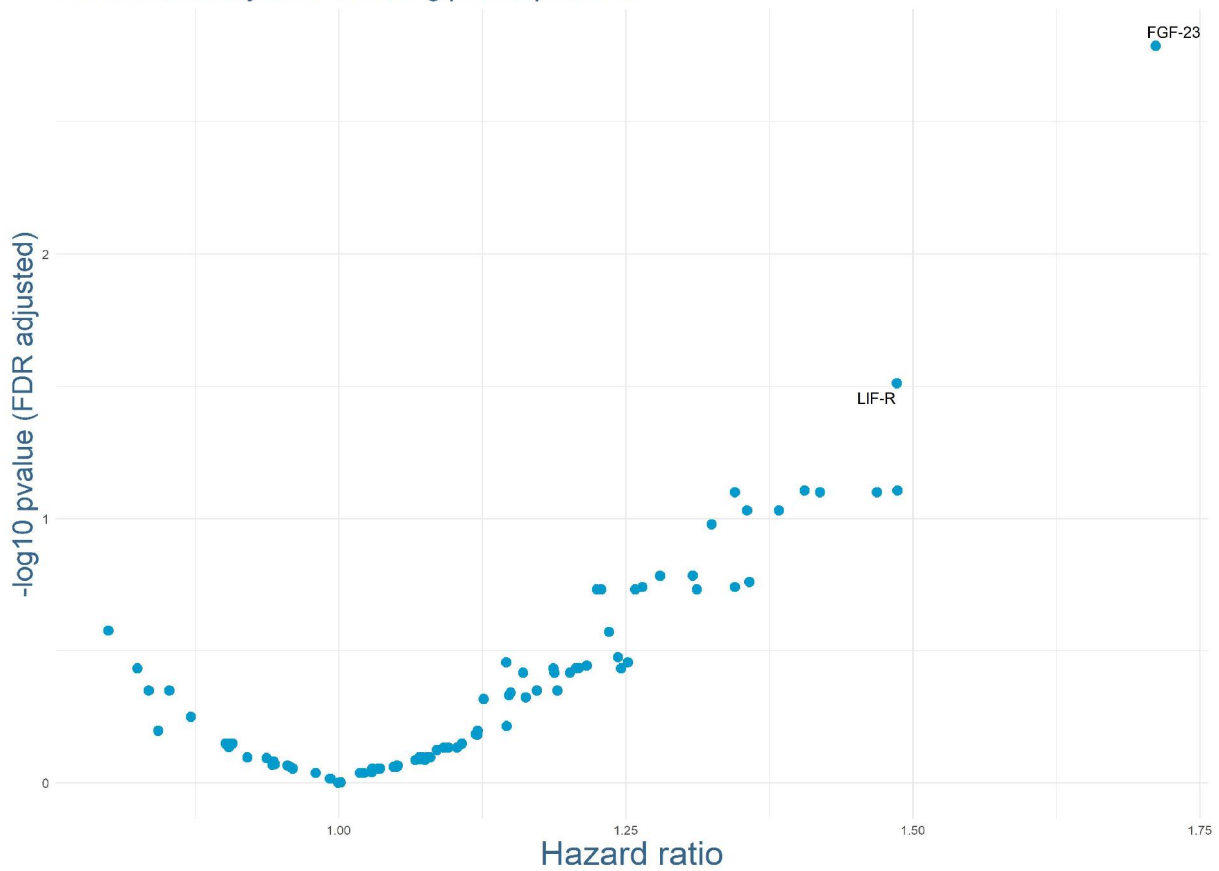

**Figure S2:** Results of the multivariable adjusted Cox regression models including prehospital time. P-values were FDR-adjusted. Names of the markers are presented for all markers with FDR-adjusted p-values below 0.05.
